# Supplementary material for: Theoretical study of GaBX3 halide perovskites for optoelectronic and energy conversion applications
Source: Royal Society of Chemistry journal article supplement (doi:10.1039/d6ra01845a), 2026-05-11
Supplement: d6ra01845a1.pdf [file d6ra01845a1.pdf]

**Table 1:** Convergence test results listed for GaBX<sub>3</sub> (B = Cd, Zn and X = Cl, Br).

| Compound            | Cutoff | K points | Formation Energy | Lattice parameter |
|---------------------|--------|----------|------------------|-------------------|
| GaCdCl <sub>3</sub> | 400    | 4×4×4    | -4.887           | 5.237             |
|                     | 500    | 4×4×4    | -4.887           | 5.228             |
|                     | 600    | 4×4×4    | -4.887           | 5.227             |
|                     | 400    | 6×6×6    | -4.887           | 5.237             |
|                     | 500    | 6×6×6    | -4.887           | 5.228             |
|                     | 600    | 6×6×6    | -4.887           | 5.227             |
|                     | 400    | 8×8×8    | -4.887           | 5.237             |
|                     | 500    | 8×8×8    | -4.887           | 5.228             |
|                     | 600    | 8×8×8    | -4.887           | 5.227             |
| GaCdBr <sub>3</sub> | 400    | 4×4×4    | -5.009           | 5.514             |
|                     | 500    | 4×4×4    | -5.009           | 5.509             |
|                     | 600    | 4×4×4    | -5.009           | 5.508             |
|                     | 400    | 6×6×6    | -5.009           | 5.516             |
|                     | 500    | 6×6×6    | -5.009           | 5.508             |
|                     | 600    | 6×6×6    | -5.009           | 5.508             |
|                     | 400    | 8×8×8    | -5.009           | 5.516             |
|                     | 500    | 8×8×8    | -5.009           | 5.509             |
|                     | 600    | 8×8×8    | -5.009           | 5.508             |
| GaZnCl <sub>3</sub> | 300    | 4×4×4    | -5.204           | 5.100             |
|                     | 400    | 4×4×4    | -5.207           | 4.935             |
|                     | 500    | 4×4×4    | -5.207           | 4.927             |
|                     | 300    | 6×6×6    | -5.204           | 5.099             |
|                     | 400    | 6×6×6    | -5.207           | 4.935             |
|                     | 500    | 6×6×6    | -5.207           | 4.927             |
|                     | 300    | 8×8×8    | -5.204           | 5.100             |
|                     | 400    | 8×8×8    | -5.207           | 4.933             |
|                     | 500    | 8×8×8    | -5.207           | 4.927             |

|                           |            |              |               |              |
|---------------------------|------------|--------------|---------------|--------------|
| <b>GaZnBr<sub>3</sub></b> | <b>400</b> | <b>4×4×4</b> | <b>-5.328</b> | <b>5.240</b> |
|                           | <b>500</b> | <b>4×4×4</b> | <b>-5.328</b> | <b>5.220</b> |
|                           | <b>600</b> | <b>4×4×4</b> | <b>-5.328</b> | <b>5.220</b> |
|                           | <b>400</b> | <b>6×6×6</b> | <b>-5.328</b> | <b>5.240</b> |
|                           | <b>500</b> | <b>6×6×6</b> | <b>-5.328</b> | <b>5.220</b> |
|                           | <b>600</b> | <b>6×6×6</b> | <b>-5.328</b> | <b>5.219</b> |
|                           | <b>400</b> | <b>8×8×8</b> | <b>-5.328</b> | <b>5.236</b> |
|                           | <b>500</b> | <b>8×8×8</b> | <b>-5.328</b> | <b>5.220</b> |
|                           | <b>600</b> | <b>8×8×8</b> | <b>-5.328</b> | <b>5.219</b> |

**Table 2:** Ionic radius of the cations and anions according to their coordination number.

| <b>Ions</b>            | <b>Coordination Number</b> | <b>Ionic Radius (Å)</b> |
|------------------------|----------------------------|-------------------------|
| <b>Ga<sup>3+</sup></b> | <b>12</b>                  | <b>0.67</b>             |
| <b>Cd<sup>2+</sup></b> | <b>6</b>                   | <b>0.95</b>             |
| <b>Zn<sup>2+</sup></b> | <b>6</b>                   | <b>0.74</b>             |
| <b>Cl<sup>-</sup></b>  | <b>6</b>                   | <b>0.27</b>             |
| <b>Br<sup>-</sup></b>  | <b>6</b>                   | <b>0.39</b>             |
